# Supplementary material for: Development, Characterization and Incorporation of Alginate-Plant Protein Covered Liposomes Containing Ground Ivy (Glechoma hederacea L.) Extract into Candies
Source: MDPI journal article supplement (doi:10.3390/foods11121816), 2022-06-20
Supplement: s1 [file s1]

## Supplementary Materials

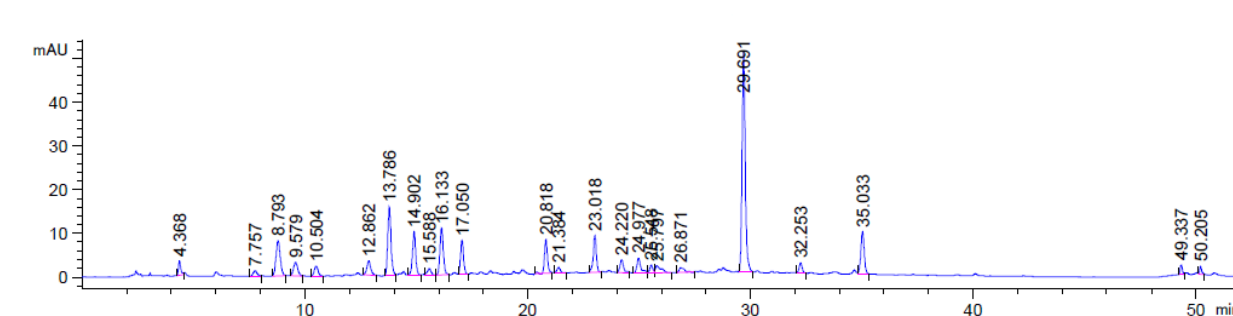

**Figure S1.** HPLC chromatogram (recorded at 320 nm) of investigated ground ivy extract

**Table S1.** Retention time and wavelength ( $\lambda$ ) of detection of rosmarinic acid

| Phenolic compound | Retention time | $\lambda_{\text{max}}$ |
|-------------------|----------------|------------------------|
| Rosmarinic acid   | 29.6 min       | 320 nm                 |
